# Supplementary material for: Multi-tumor analysis of cancer-stroma interactomes of patient-derived xenografts unveils the unique homeostatic process in renal cell carcinomas
Source: PubMed Central journal article supplement (PMC8767947; doi:10.1016/j.isci.2021.103322), 2021-10-21
Supplement: mmc1.pdf [file mmc1.pdf]

**Supplemental information**

**Multi-tumor analysis of cancer-stroma interactomes  
of patient-derived xenografts unveils the unique homeostatic process  
in renal cell carcinomas**

**Kuniyo Sueyoshi, Daisuke Komura, Hiroto Katoh, Asami Yamamoto, Takumi Onoyama, Tsuyoshi Chijiwa, Takayuki Isagawa, Mariko Tanaka, Hiroshi Suemizu, Masato Nakamura, Yohei Miyagi, Hiroyuki Aburatani, and Shumpei Ishikawa**

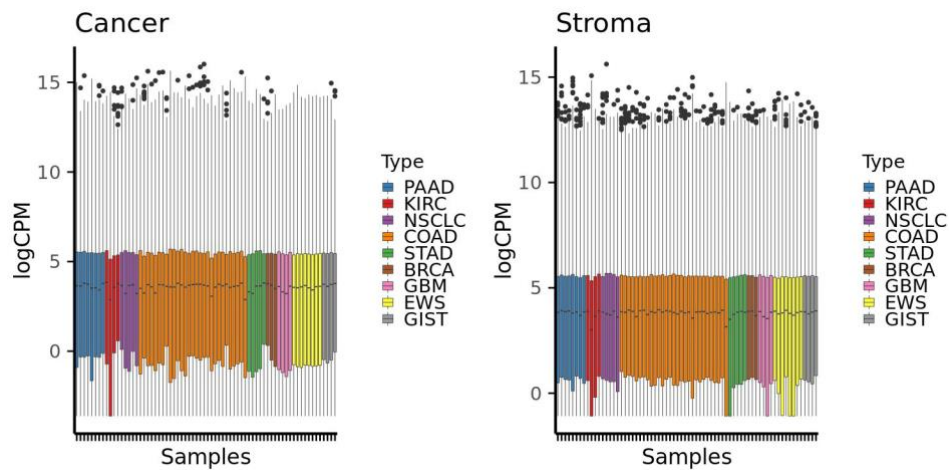

**Figure S1. Gene expression distribution of cancer and stromal components of PDXs, Related to Figure 2.**

The y-axis “logTPM” represents the logarithm of TMM-normalized TPM values, with the prior count being 0.25. A whisker in each box indicates the median logTPM value of a sample. The lower limit of each box represents the first quartile, whereas the upper limit does the third quartile.

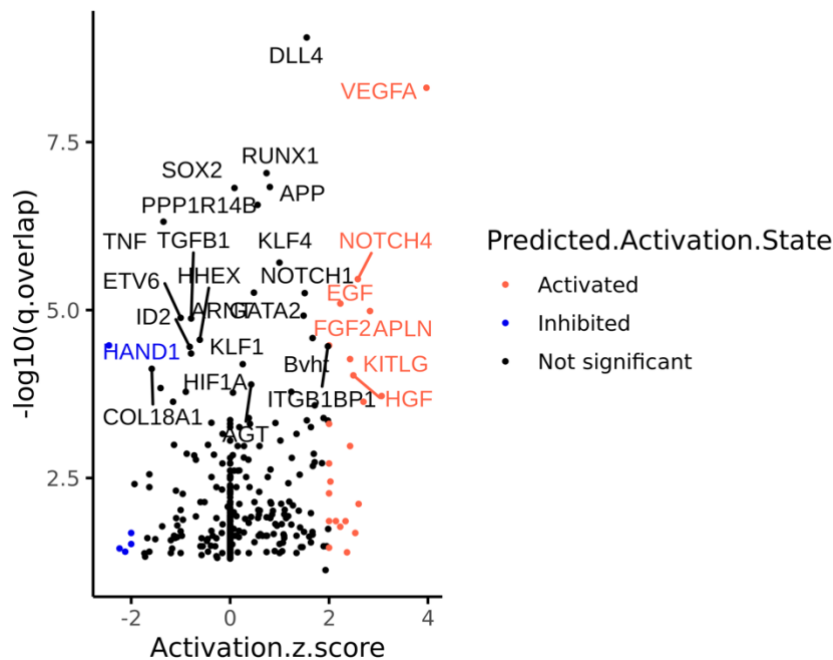

**Figure S2. Estimated upstream regulators over the top 300 DE genes in KIRC stroma, Related to Figure 4.**

X-axis: statistics of the activation z-score that indicate the concordance of the predicted direction and the observed direction of the expression of the preset downstream genes.

$$z = \frac{\sum_i x_i}{\sqrt{N}} \quad (x_i \in \{-1,1\})$$

where  $x_i$  represents the direction of the activation of  $i^{th}$

downstream gene, with  $i$  ranging from 1 to  $N$ . Upstream genes are defined as significantly activated (red) or inhibited (blue) if the absolute value of the z score is larger than 2. Y-axis: negative logarithm of the  $p$ -value of the overlap on the Fisher's exact test for the preset downstream genes (IPA®) as well as the observed genes in the top 300 DE genes of KIRC stroma.

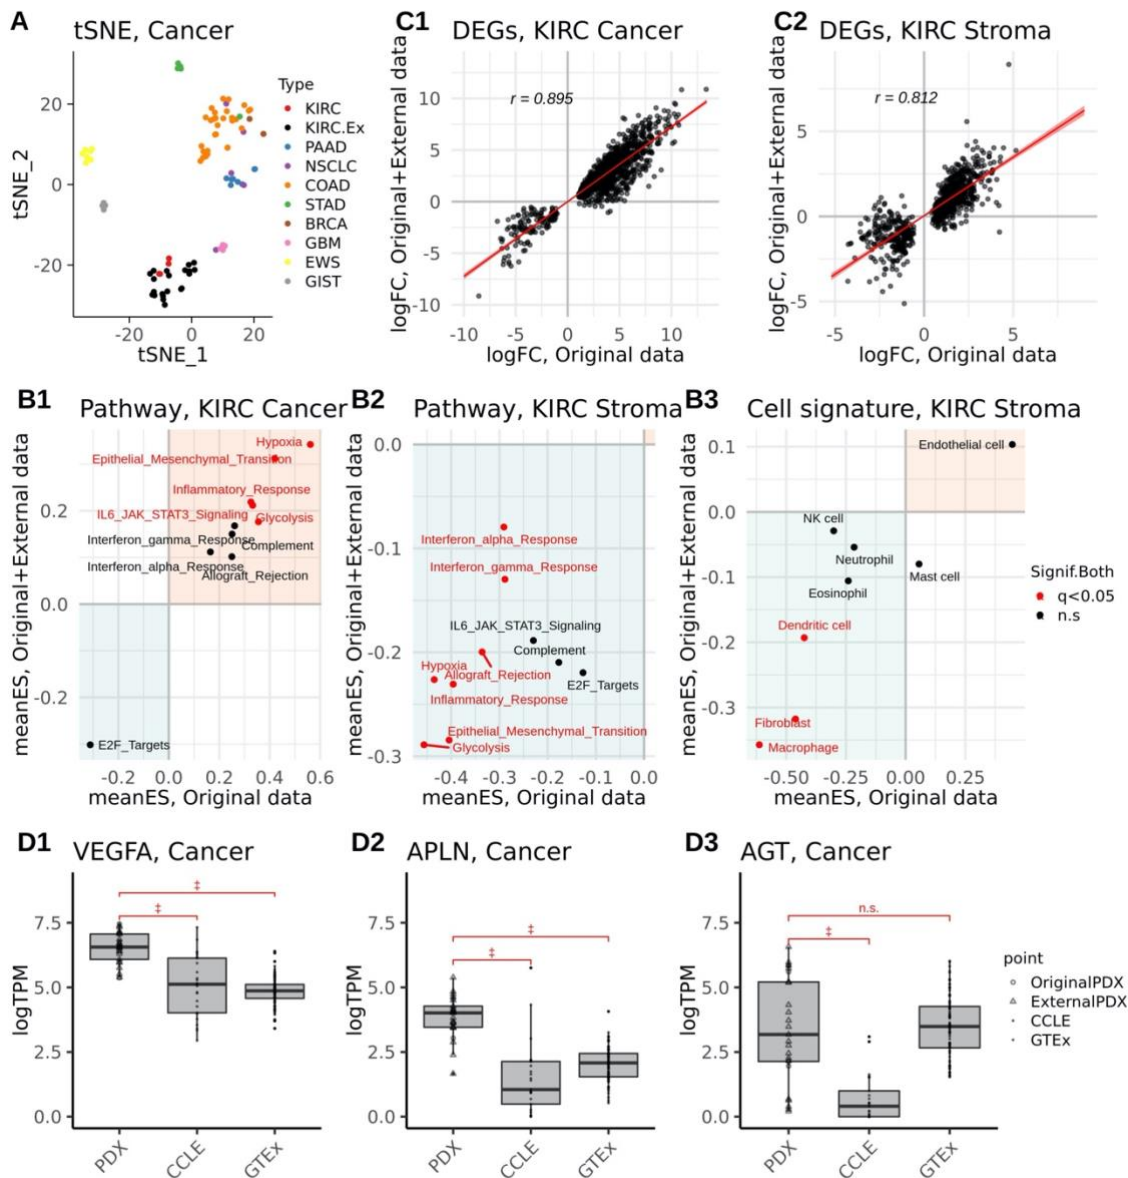

**Figure S3. The concordance of our original KIRC data with external data, Related to Figure 4.**

Our original KIRC data consist of 4 PDXs from 2 patients, while external data include 21 PDXs from 17 tumor sites of 15 patients. **(A)** The t-SNE plot of the cancer components of the external data (dots in black) and our original PDXs (colored dots). **(B)** Mean enrichment scores (meanES) of pathway analyses **(B1, B2)** and a cell signature analysis **(B3)** with or without the external KIRC samples. Dots and labels highlighted in red indicate pathways or cell types of  $q < 0.05$  in the original data, and  $q < 0.05$  in the combined data on the moderated t-test. **(C)** Log fold-change (logFC) of differentially expressed genes identified in our original KIRC data were shown. Pearson's correlation coefficients  $r$  and linear regression lines with SEM ranges are shown in the plots. **(D)** The relative expression levels of estimated paracrine

effectors; VEGFA (**D1**), APLN (**D2**), and AGT (**D3**) in PDX cancer components, KIRC cell lines (CCLE), and normal kidney tissue samples (GTEx). The letter n.s., †, or ‡ in red represent  $p \geq 0.05$ ,  $p < 0.05$ , or  $p < 0.005$  on the Mann-Whitney U test, respectively.
